# Supplementary material
Source: PubMed Central journal article supplement (PMC3349863)

# Supplemental Figure S1

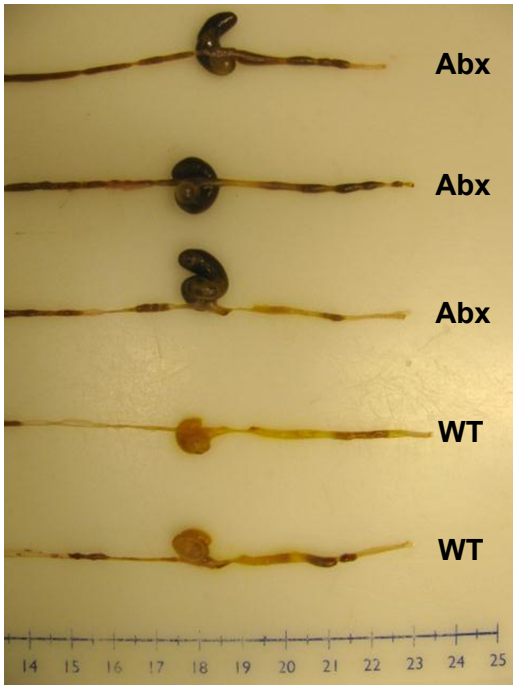

Supplement: mmc1.pdf [file mmc1.pdf]

# Supplemental Figure S2

**A**

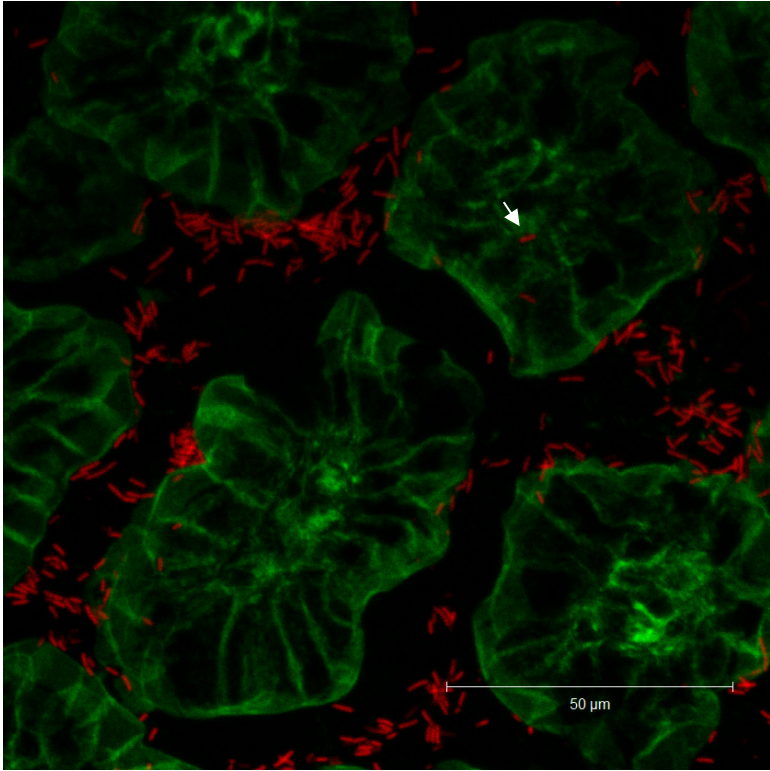

**B**

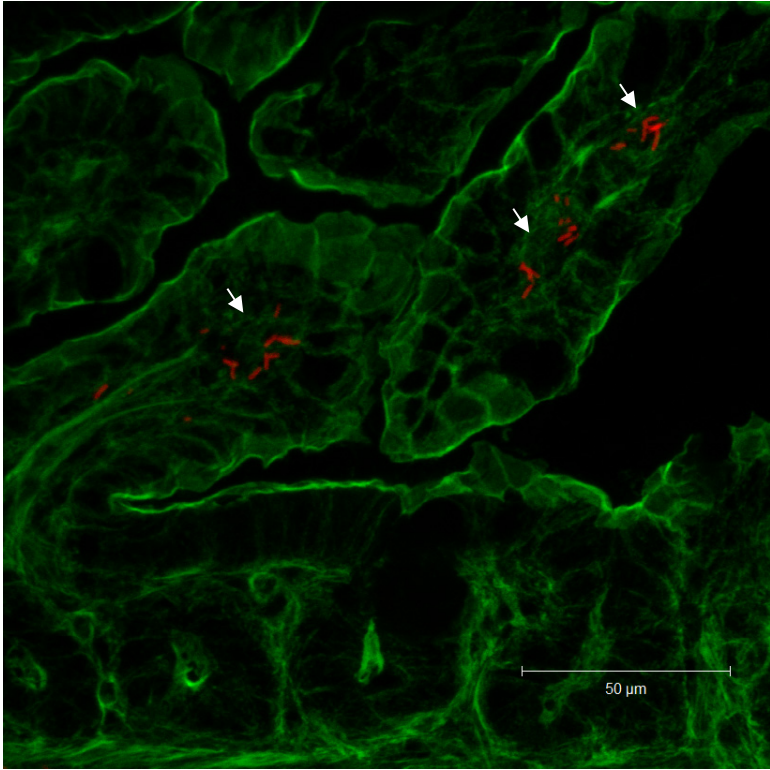

Supplement: mmc2.pdf [file mmc2.pdf]
